# Supplementary material for: Assessment of shared alleles in drought-associated candidate genes among southern California white oak species (Quercus sect. Quercus)
Source: BMC Genet. 2018 Oct 1;19:88. doi: 10.1186/s12863-018-0677-9 (PMC6167808; doi:10.1186/s12863-018-0677-9)
Supplement: Supplementary file 1 — Candidate gene list associated with drought stress. Table S1. Candidate loci were taken from evoltree database depending on search tool for drought and hypoxia relates stress (target trait) and matched the sequences to the Quercus lobata reference transcriptome [29]. The information of gene names, protein locus and functions was taken from NCBI database based on given information in evoltree database [32]. (XLS 48 kb) [file 12863_2018_677_MOESM1_ESM.xls]

## Sheet: Sheet1
Assessment of shared alleles in drought-associated candidate genes among southern California white oak species (Quercus sect. Quercus) Signem Oney-Birol1*, Sorel Fitz-Gibbon2*, Jin-Ming Chen3, Paul F. Gugger 4, 5, Victoria L. Sork4,6 * 1 Department of Molecular Biology and Genetics, Faculty of Arts and Sciences, Mehmet Akif Ersoy University, Burdur, 15030, Turkey 2 Institute of Genomics and Prote…
Table S1.Candidate loci were taken from evoltree database depending on search tool for drought and hypoxia relates stress (target trait) and matched the sequences to the Quercus lobata reference transcriptome (Cokus et al. 2015). The information of gene names, protein locus and functions was taken from NCBI database based on given information in evoltree database (w3.evoltree.eu/index.php/candida…
Quercus_lobata_Contigs	Candidate Locus (evoltree)	Gene Symbol (NCBI)	Protein Locus (NCBI)	Description of the Gene/Protein (NCBI vs evoltree)	Target Trait (evoltree)
m01oak00003cm	CL8450CT11862_10		CAP74535	putative TdLSC21 protein	Drought and Hypoxia related stress
m01oak00013cC	CL8461CT12097_01+02	ELIP		early light-induced protein	Drought and Hypoxia related stress
m01oak00020Ct	CL9715CT15511	ssa-13		putative senescence-associated protein	Drought and Hypoxia related stress
m01oak00108CC	CL8461CT12096_03	FBA1		fructose-bisphosphate aldolase, putative fructose-bisphosphate aldolase, putative	Drought and Hypoxia related stress
m01oak00320CT	CL9715CT12709_02+03	BURP		Dehydration-responsive protein RD22 precursor, putative	Drought and Hypoxia related stress
m01oak00399CT	CL5359CT11480	GST2		glutathione S-transferase	Drought and Hypoxia related stress
m01oak00426CC	CL4747CT5337_03		ACI46953	putative lacasse/diphenol oxidase	Drought and Hypoxia related stress
m01oak00451JC	CL8450CT11779_02	HSP70-3		heat shock protein 70-3	Drought and Hypoxia related stress
m01oak00452CC	CL400CT508_02	FDH		fiddlehead-like protein	Drought and Hypoxia related stress
m01oak00456jF	CL8450CT11858	GH16_XET		Xyloglucan endotransglucosylase/hydrolase protein 9 precursor, putative	Drought and Hypoxia related stress
m01oak00457CC	CL2172CT2508	RCOM_0217590		transcription factor, putative	Drought and Hypoxia related stress
m01oak00494cT	CL9715CT15911_02	RCOM_0382150		Histone deacetylase 2a, putative	Drought and Hypoxia related stress
m01oak00521CC	CL7749CT8647_02	HSP70		Heat shock 70 kDa protein	Drought and Hypoxia related stress
m01oak00682cC	CL8461CT12059_01	RCOM_1354270		s-adenosylmethionine synthetase, putative	Drought and Hypoxia related stress
m01oak00688CC	CL673CT835_02	LOC102577806		beta-amylase PCT-BMYI	Drought and Hypoxia related stress
m01oak00775CC	CL6341CT7092_01	atpD		chloroplast ATP synthase	Drought and Hypoxia related stress
m01oak00831cC	CL1122CT1352_04	AGO911		argonaute protein group	Drought and Hypoxia related stress
m01oak00862JC	CL9715CT16564_04	OSJNBa0093F16.10		putative transaldolase	Drought and Hypoxia related stress
m01oak00889cC	CL8846CT12357_04	PLDalpha		phospholipase D alpha	Drought and Hypoxia related stress
m01oak00924cC	CL9715CT12691_03	IAA8		GH1 protein	Drought and Hypoxia related stress
m01oak00934JC	CL9715CT16159_02	LOC8283183		Peroxidase 12 precursor, putative	Drought and Hypoxia related stress
m01oak00943CC	CL8593CT9910_03	USP		Universal stress protein	Drought and Hypoxia related stress
m01oak01060cC	CL586CT732_04	LOC8271083		malate dehydrogenase, putative	Drought and Hypoxia related stress
m01oak01098cT	CL7464CT8327_01	LOC8260951		syntaxin-related protein KNOLLE	Drought and Hypoxia related stress
m01oak01188Ct	CL3643CT4126_01	YLS9	ABZ80409	hairpin-inducing protein	Drought and Hypoxia related stress
m01oak01194cC	CL8709CT12308		BAF01483	pyruvate kinase	Drought and Hypoxia related stress
m01oak01228cC	CL8826CT10236_03	LOC8268054		Heme-binding protein, putative	Drought and Hypoxia related stress
m01oak01245cc	CL3828CT4328	LOC8281166		subtilisin-like protease SBT1.8	Drought and Hypoxia related stress
m01oak01330CF	CL651CT809_03		XP_002309513	glycine hydroxymethyltransferase family protein	Drought and Hypoxia related stress
m01oak01402CC	CL9715CT15477_01		AAR31107	phenylalanine ammonia-lyase	Drought and Hypoxia related stress
m01oak01466JF	CL248CT320_02		ABO69703	9-cis-epoxycarotenoid dioxygenase	Drought and Hypoxia related stress
m01oak01473cC	CL3460CT3925_03	APA1	ABG37021	aspartic protease	Drought and Hypoxia related stress
m01oak01475Cz	CL663CT822_02	LOC8285850		putative laccase-9	Drought and Hypoxia related stress
m01oak01539cC	CL7837CT11561_01	AT5G11900		translation machinery-associated protein 22	Drought and Hypoxia related stress
m01oak01540cC	CL1622CT1917	LOC8259571		UDP-sulfoquinovose synthase, chloroplastic	Drought and Hypoxia related stress
m01oak01607cC	CL166CT216	LOC107796541		UDP-glucose 6-dehydrogenase 3-like	Drought and Hypoxia related stress
m01oak01622cC	CL419CT532_02	LOC8276219		probable histone H2A variant 3	Drought and Hypoxia related stress
m01oak01647cC	CL7786CT8686_02	LOC107796674		L-ascorbate oxidase homolog	Drought and Hypoxia related stress
m01oak01724cC	CL9715CT14526_03	LOC8287768		long chain acyl-CoA synthetase 4	Drought and Hypoxia related stress
m01oak01757cC	CL8129CT9051_02	LOC8266961		protein HOTHEAD	Drought and Hypoxia related stress
m01oak01838Ci	CL8754CT10139_03	LOC8258606		polyadenylate-binding protein-interacting protein 7	Drought and Hypoxia related stress
m01oak01882jt	CL9715CT14774_03		P5CS_MESCR	RecName: Full=Delta-1-pyrroline-5-carboxylate synthase; Short=P5CS; Includes: RecName: Full=Glutamate 5-kinase; Short=GK; AltName: Full=Gamma-glutamyl kinase; Includes: RecName: Full=Gamma-glutamyl phosphate reductase; Short=GPR; AltName: Full=Glutamate-5-semialdehyde dehydrogenase; AltName: Full=Glutamyl-gamma-semialdehyde dehydrogenase	Drought and Hypoxia related stress
m01oak01914CF	LG0AAA10YO07RM1_2A_01		EEF31034	ER glycerol-phosphate acyltransferase	Drought and Hypoxia related stress
m01oak01922jc	CL57CT73_03	CESA2		CesA7A-like family protein	Drought and Hypoxia related stress
m01oak02014cC	CL5719CT6408_02	AUX_IAA;		auxin-responsive protein IAA7	Drought and Hypoxia related stress
m01oak02149Cz	CL3460CT3925_03	LOC107828978		cyprosin-like	Drought and Hypoxia related stress
m01oak02175CC	CL273CT351_04		EEE71295	precursor of carboxylase t-protein 2, glycine decarboxylase complex	Drought and Hypoxia related stress
m01oak02203cC	CL8918CT10353_01	LOC107008218		zinc finger A20 and AN1 domain-containing stress-associated protein 5	Drought and Hypoxia related stress
m01oak02206CC	CL7490CT8358_01		KPYA_TOBAC	RecName: Full=Pyruvate kinase isozyme A, chloroplastic; Flags: Precursor	Drought and Hypoxia related stress
m01oak02259CC	CL6464CT7230_01	LOC8274845		probable beta-1,3-galactosyltransferase 2	Drought and Hypoxia related stress
m01oak02281jC	CL8788CT12334_03		ABE03629	plasma membrane major intrinsic protein	Drought and Hypoxia related stress
m01oak02393CC	CL2221CT2563_02		ACQ77596	CCR4-NOT	Drought and Hypoxia related stress
m01oak02407cC	CL8450CT11852_04		ABL86685	CLT3	Drought and Hypoxia related stress
m01oak02441CC	CL9715CT12653_01		ABC74529	glucose-6-phosphate dehydrogenase	Drought and Hypoxia related stress
m01oak02465Cz	CL353CT444_02	PGR5		protein PROTON GRADIENT REGULATION 5, chloroplastic	Drought and Hypoxia related stress
m01oak02471jC	CL5405CT6056_03		ABR67417	ATP/GTP/Ca++ binding protein	Drought and Hypoxia related stress
m01oak02650CC	CL1507CT1788_02	LOC8283429		vesicle transport v-SNARE 13	Drought and Hypoxia related stress
m01oak02703CC	CL9715CT15566		AAN18099	At5g60490/muf9_140	Drought and Hypoxia related stress
m01oak02710cC	CL8129CT9051_04	LOC8285787		3-ketoacyl-CoA synthase 6	Drought and Hypoxia related stress
m01oak02859cC	CL7094CT7919	EIF5		Eukaryotic initiation factor-5	Drought and Hypoxia related stress
m01oak02906Cf	CL5734CT6423_01	LOC106763852		calcium-dependent protein kinase 26	Drought and Hypoxia related stress
m01oak02926cC	CL9388CT12498	PPC1		phosphoenolpyruvate carboxylase 2	Drought and Hypoxia related stress
m01oak03150cF	CL8361CT9305_01	POPTR_0001s21120g		ethylene receptor family protein	Drought and Hypoxia related stress
m01oak03200CC	CL3845CT4345	PLT5		polyol transporter 5-like	Drought and Hypoxia related stress
m01oak03231Ci	CL6448CT7211_04	LOC8280624		probable methionine--tRNA ligase	Drought and Hypoxia related stress
m01oak03358CC	CL8437CT9437_01	4CL1	BAE20401	4-coumarate-CoA ligase, partial	Drought and Hypoxia related stress
m01oak03411cC	CL5874CT11506_03	LOC543243		adenylosuccinate synthetase	Drought and Hypoxia related stress
m01oak03472CT	CL9629CT11162	LOC8288143		phosphatidylinositol 3,4,5-trisphosphate 3-phosphatase and protein-tyrosine-phosphatase PTEN2A	Drought and Hypoxia related stress
m01oak03512CC	CL6990CT7804_02	MSSP3		monosaccharide-sensing protein 2	Drought and Hypoxia related stress
m01oak03575jC	CL5145CT5765_02	CRY1		cryptochrome-1	Drought and Hypoxia related stress
m01oak03700CC	CL7195CT8034_03	POPTR_0009s05570g		ABC transporter-related family protein	Drought and Hypoxia related stress
m01oak03853cC	CL3629CT4107_01		AF332874_1	phosphoinositide-specific phospholipase C	Drought and Hypoxia related stress
m01oak04056CC	CL7466CT8329_01	ABR45724		GDH2	Drought and Hypoxia related stress
m01oak04078CC	CL8146CT9070_02	LOC8266454		oxalate--CoA ligase	Drought and Hypoxia related stress
m01oak04251CC	CL6368CT7123_01	IBR10		indole-3-butyric acid response 10	Drought and Hypoxia related stress
m01oak04458cC	CL9715CT14030_01	LOC8289001		50S ribosomal protein L7/L12	Drought and Hypoxia related stress
m01oak04613CC	CL5617CT6296_02	ACR8		ACT domain-containing protein ACR8	Drought and Hypoxia related stress
m01oak04706cf	CL6042CT6765_01		ABV02028	mevalonate diphosphate decarboxylase, partial	Drought and Hypoxia related stress
m01oak04867CC	WZ0AQRAQ27YF23FM1_01	LOC8273454		fructokinase-like 1, chloroplastic	Drought and Hypoxia related stress
m01oak04894cC	CL9645CT11179_01	LOC18773117		ethylene-insensitive protein 2	Drought and Hypoxia related stress
m01oak04954cC	CL2087CT2418_01		CAA76834	SPINDLY protein	Drought and Hypoxia related stress
m01oak05087CF	CL1955CT2274_03	LOC8266536		BTB/POZ domain-containing protein At1g30440	Drought and Hypoxia related stress
m01oak05284CC	CL4053CT4574_01, CL4053CT4574_03	AAP6	EEE80402	amino acid permease (protein),amino acid permease 6 (gene)	Drought and Hypoxia related stress
m01oak05408CC	CL4059CT4582_01	LOC8283942		caffeic acid 3-O-methyltransferase	Drought and Hypoxia related stress
m01oak05425CC	CL2436CT2804_02+03		CAR92125	putative hexose transporter protein	Drought and Hypoxia related stress
m01oak05640cC	CL5737CT6427_03	LOC8288340		caffeoyl-CoA O-methyltransferase	Drought and Hypoxia related stress
m01oak06032cC	WZ0AQRAI1YF15FM1_01	LOC8262611		two-component response regulator ARR1	Drought and Hypoxia related stress
m01oak06111Cz	CL8863CT10284_03		ABG66141	Malate dehydrogenase, cytoplasmic, putative, expressed	Drought and Hypoxia related stress
m01oak06196ct	CL8877CT10305_02		CAB60128	plastidial phosphoglucomutase	Drought and Hypoxia related stress
m01oak06202Cf	CL8231CT9164_01	LOC100257429		E3 ubiquitin-protein ligase RMA1H1	Drought and Hypoxia related stress
m01oak06231cC	CL6811CT7609_01	LOC8281330		exosome complex exonuclease RRP44 homolog A	Drought and Hypoxia related stress
m01oak06290cC	CL9715CT14338_01	LOC8272984		probable galacturonosyltransferase-like 1	Drought and Hypoxia related stress
m01oak06471jC	CL63CT84_03	LOC8288487		gibberellin receptor GID1C	Drought and Hypoxia related stress
m01oak06630cT	CL9715CT14944_01+02		AAM62648	dehydration stress-induced protein	Drought and Hypoxia related stress
m01oak06893CC	CL9715CT15674_02		BAA88981	sucrose synthase	Drought and Hypoxia related stress
m01oak06922cC	CL9715CT14239_02	LOC8270550		monosaccharide-sensing protein 2	Drought and Hypoxia related stress
m01oak07159cC	CL8450CT11823_02	LOC100793538		cytochrome P450 84A1-like	Drought and Hypoxia related stress
m01oak07295cC	CL9715CT15999_02	MAN3		mannan endo-1,4-beta-mannosidase 2-like	Drought and Hypoxia related stress
m01oak07433CC	CL4155CT4694_02	ABA 8'-hydroxylase CYP707A1		ABA 8'-hydroxylase CYP707A1	Drought and Hypoxia related stress
m01oak07914CC	CL9715CT13837	LOC8283141		pyruvate decarboxylase 2	Drought and Hypoxia related stress
m01oak08909CC	CL8458CT11876	POPTRDRAFT_591841		glycosyltransferase family GT8	Drought and Hypoxia related stress
m01oak09012cC	CL5296CT5939_02	4CLL7		4-coumarate--CoA ligase-like 7	Drought and Hypoxia related stress
m01oak09019CC	CL7021CT7837_01	POPTR_0004s14790g		abscisic acid responsive element-binding factor 1 family protein	Drought and Hypoxia related stress
m01oak09022JC	CL9715CT16072_02, CL9715CT16072_03	MYB30		R2R3 Myb30 transcription factor	Drought and Hypoxia related stress
m01oak09381CC	CL9715CT14971_02	AAP3		amino acid permease 3	Drought and Hypoxia related stress
m01oak09555Ct	CL2989CT3402		AAM64661	cystatin-like protein	Drought and Hypoxia related stress
m01oak09732cF	CL310CT396_01		BAA86060	JPR ORF1	Drought and Hypoxia related stress
m01oak10372cf	CL7424CT8284_01		BAF00814	ABC transporter-like protein	Drought and Hypoxia related stress
m01oak10430CC	CL6080CT11513_03	LOC8271239		E3 ubiquitin-protein ligase MIEL1	Drought and Hypoxia related stress
m01oak10456CC	CL6004CT6724_02	LOC8265945		L-ascorbate oxidase homolog	Drought and Hypoxia related stress
m01oak11002CC	CL6579CT7355_02	LOC8267696		NEP1-interacting protein-like 1	Drought and Hypoxia related stress
m01oak11558Ct	CL3546CT4016		ABP98988	CBF/DREB1 transcription factor 2	Drought and Hypoxia related stress
m01oak11881cC	CL6105CT6839_01	LOC8269243		SNF1-related protein kinase regulatory subunit gamma-1	Drought and Hypoxia related stress
m01oak12778cf	CL8217CT9149_02		CAM35833	respiratory burst oxidase homologue	Drought and Hypoxia related stress
m01oak13377CT	WZ0AQRAQ16YP22FM1_01	HSF		heat stress transcription factor B-2a	Drought and Hypoxia related stress
m01oak13660Cz	CL8429CT11627_03		AAC26045	aconitase-iron regulated protein 1	Drought and Hypoxia related stress
m01oak13764SC	WZ0AQPAC8YD08CM1_01		ABD67495	RAMOSUS4	Drought and Hypoxia related stress
m01oak13869CT	CL9715CT14298_02	LOC8281787		titin	Drought and Hypoxia related stress
m01oak14640CC	CL6527CT7299_03		ACD76094	VRP1-2	Drought and Hypoxia related stress
m01oak15734cC	CL2540CT2914_04, CL2540CT2914_01+02	LOC8277592		cytochrome P450 94C1	Drought and Hypoxia related stress
m01oak17664cC	CL2364CT2727_02+03+04	LOC8284461		UDP-glucose 6-dehydrogenase 1	Drought and Hypoxia related stress
m01oak18077Cz	CL9715CT14774_01	LOC8287478		delta-1-pyrroline-5-carboxylate synthase	Drought and Hypoxia related stress
m01oak18267CC	CL1035CT1250_01		EEF02181	cytochrome P450	Drought and Hypoxia related stress
m01oak19660cC	CL2272CT2621	LOC8275938		germin-like protein subfamily 1 member 17	Drought and Hypoxia related stress
m01oak21711Cz	CL3629CT4107_01		AF332874_1	phosphoinositide-specific phospholipase C	Drought and Hypoxia related stress
m01oak22868cC	CL9715CT12757_02	LOC8265861		transcription factor MYB86	Drought and Hypoxia related stress
m01oak23357cC	CL6218CT6962_02		AAN06953	amt2-like protein	Drought and Hypoxia related stress
m01oak24590Cz	CL6527CT7299_03		ACD76094	VRP1-2	Drought and Hypoxia related stress
m01oak26671Cz	CL3546CT4016		ABP98988	CBF/DREB1 transcription factor 2	Drought and Hypoxia related stress
m01oak27754cC	CL5938CT6651_01	LOC100248593		cytochrome b561 domain-containing protein At4g18260	Drought and Hypoxia related stress
m01oak35141cC	CL7197CT8036		ABZ80831	CYP86A32 fatty acid omega-hydroxylase	Drought and Hypoxia related stress
m01oak39427Cz	CL8461CT12075_03		AAL09820	putative 2,3-bisphosphoglycerate-independent phosphoglycerate mutase	Drought and Hypoxia related stress
m01oak40198CC	CL9715CT13555_03	LOC8279635		protein NRT1/ PTR FAMILY 6.3	Drought and Hypoxia related stress
m01oak41766Cz	CL6004CT6724_02	LOC8265945		L-ascorbate oxidase homolog	Drought and Hypoxia related stress
m01oak43131CT	CL568CT709_01	LOC8274390		cytochrome P450 71A1	Drought and Hypoxia related stress
m01oak48589Cz	WZ0AQRAQ18YA23FM1_02	LOC8279115		ADP-ribosylation factor-like protein 2	Drought and Hypoxia related stress
m01oak54868Cz	CL8450CT11862_10		CAP74535	putative TdLSC21 protein, partial	Drought and Hypoxia related stress
m01oak57528Cz	CL9715CT13130	LOC8263324		secoisolariciresinol dehydrogenase	Drought and Hypoxia related stress
m01oak62355CT	CL801CT987	AAI_LTSS		Bifunctional inhibitor/lipid-transfer protein/seed storage 2S albumin superfamily protein	Drought and Hypoxia related stress
